# Supplementary material
Source: HighWire-hosted journal article supplement (https://cmaj.ca/highwire/filestream/58321/field_highwire_adjunct_files/0/nursing-hu-1-at.pdf)
Supplement: nursing-hu-1-at.pdf [file nursing-hu-1-at.pdf]

## **Appendix 1 (as submitted by the authors): Exposure groups**

### **Atypical Antipsychotics:**

Clozapine, olanzapine, quetiapine, risperidone

### **Conventional Antipsychotics:**

Chlorpromazine, chlorprothixene, fluphenazine, haloperidol, loxapine, mesoridazine, perphenazine, pimozide, promazine, thioridazine, thiothixene, trifluoperazine

### **Antidepressants:**

Amitriptyline, amitriptyline HCl/perphenazine, amoxapine, citalopram, clomipramine, desipramine, doxepin, escitalopram, fluoxetine, fluvoxamine, imipramine, isocarboxazid, maprotiline, mirtazapine, moclobemide, nortriptyline, paroxetine, phenelzine, protriptyline, sertraline, tranylcypromine, trazodone, trimipramine, venlafaxine

### **Hypnotic Agents:**

Primarily used as anti-anxiety agents: Alprazolam, chlordiazepoxide/hydrochloride, clonazepam, clorazepate dipotassium, lorazepam,

Primarily used to induce sleep: diazepam, estazolam, flurazepam/hydrochloride, oxazepam, temazepam, triazolam, zolpidem tartrate, zaleplon, chloral hydrate, diphenhydramine/hydrochloride, glutethimide
